# Supplementary material for: Identification of white campion (Silene latifolia) guaiacol O-methyltransferase involved in the biosynthesis of veratrole, a key volatile for pollinator attraction
Source: PubMed Central journal article supplement (PMC3492160; doi:10.1186/1471-2229-12-158), 2012-08-31

**(a) Mass spectra of product formed by SIGOMT1**

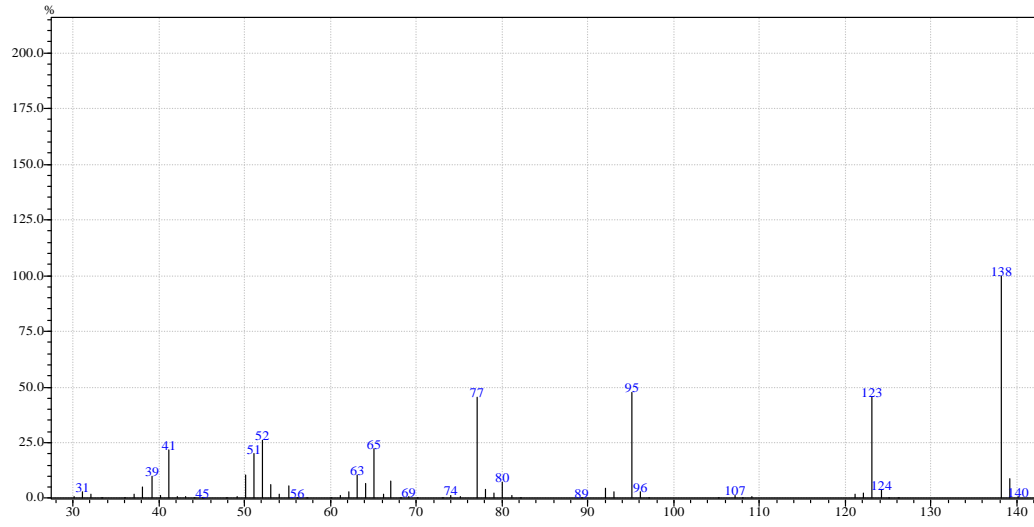

**(b) Mass spectra of veratrole authentic standard**

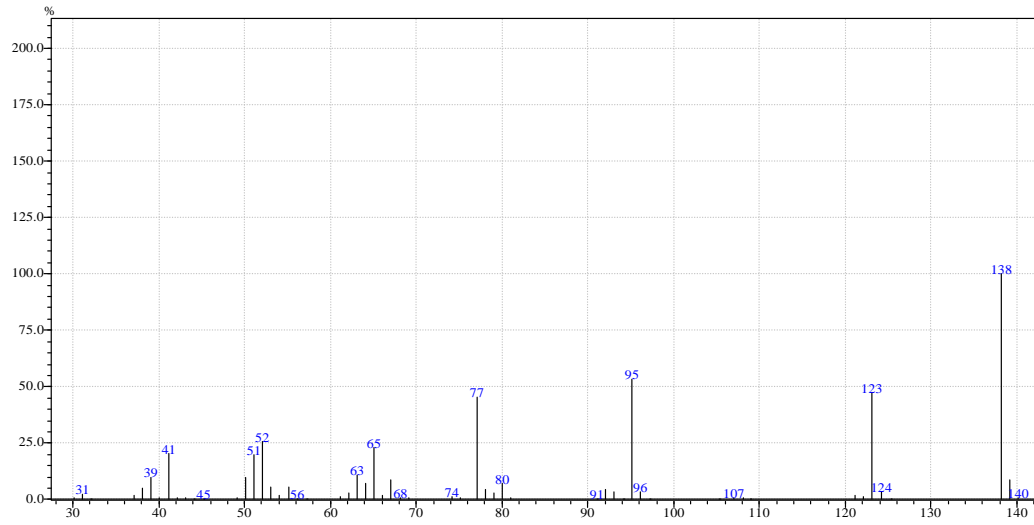

Supplement: 1471-2229-12-158-S1.pdf [file 1471-2229-12-158-S1.pdf]
