# Supplementary material for: Identification of white campion (Silene latifolia) guaiacol O-methyltransferase involved in the biosynthesis of veratrole, a key volatile for pollinator attraction
Source: PubMed Central journal article supplement (PMC3492160; doi:10.1186/1471-2229-12-158), 2012-08-31
Supplement: 1471-2229-12-158-S2.pdf [file 1471-2229-12-158-S2.pdf]

|    |                           |                                                                   |
|----|---------------------------|-------------------------------------------------------------------|
| 1  | XM_002461644.1            | <i>Sorghum bicolor</i> seq                                        |
| 2  | FP096422.1                | <i>Phllostachys edulis</i> seq                                    |
| 3  | AK247737.1                | <i>Solanum lycopersicum</i> seq1                                  |
| 4  | AK320249.1                | <i>Solanum lycopersicum</i> seq2                                  |
| 5  | AY337462.1                | <i>Mentha piperita</i> O- methyltransferase5                      |
| 6  | EU882970.1                | <i>Eschscholzia californica</i> O-methyltransferase               |
| 7  | XM_002517911.1            | <i>Ricinus communis</i> O-methyltransferase7                      |
| 8  | SIGOMT1 (From this study) | <i>Silene latifolia</i> guaiacol O-methyltransferase1             |
| 9  | SIGOMT2 (From this study) | <i>Silene latifolia</i> guaiacol O-methyltransferase2             |
| 10 | SdOMT1 (From this study)  | <i>Silene dioica</i> guaiacol O-methyltransferase1                |
| 11 | SdOMT2 (From this study)  | <i>Silene dioica</i> guaiacol O-methyltransferase2                |
| 12 | EF444545.1                | <i>Catharanthus roseus</i> hydroxytabersonine O-methyltransferase |
| 13 | EF444544.1                | <i>Catharanthus roseus</i> O-methyltransferase1                   |
| 14 | EF444546.1                | <i>Catharanthus roseus</i> O-methyltransferase2                   |
| 15 | AY942159.1                | <i>Medicago truncatula</i> isoflavone 7-O-methyltransferase1      |
| 16 | U69554.1                  | <i>Pisum sativum</i> hydroxymaackiain methyltransferase6          |
| 17 | AY942158.1                | <i>Medicago truncatula</i> isoflavone 7-O-methyltransferase2      |
| 18 | DQ419913.1                | <i>Medicago truncatula</i> isoflavone 7-O-methyltransferase3      |
| 19 | BT096188.1                | <i>Glycine max</i> seq                                            |
| 20 | XM_002522455.1            | <i>Ricinus communis</i> O-methyltransferase6                      |
| 21 | XM_002331924.1            | <i>Populus trichocarpa</i> flavonoid O-methyltransferase8         |
| 22 | XM_002331923.1            | <i>Populus trichocarpa</i> flavonoid O-methyltransferase7         |
| 23 | XM_002305068.1            | <i>Populus trichocarpa</i> flavonoid O-methyltransferase2         |
| 24 | EF535147.1                | <i>Vitis vinifera</i> OMT3                                        |
| 25 | XM_002278172.1            | <i>Vitis vinifera</i> seq1                                        |
| 26 | XM_002278109.1            | <i>Vitis vinifera</i> seq2                                        |
| 27 | AB014456.1                | <i>Pyrus pyrifolia</i> O-methyltransferase                        |
| 28 | AY894417.1                | <i>Ruta graveolens</i> 3 5 dimethoxyphenol O-methyltransferase    |
| 29 | XM_002278113.1            | <i>Vitis vinifera</i> seq 3                                       |
| 30 | XM_002278070.1            | <i>Vitis vinifera</i> seq 4                                       |
| 31 | XM_002262797.1            | <i>Vitis vinifera</i> seq 5                                       |
| 32 | XM_002278362.1            | <i>Vitis vinifera</i> seq 6                                       |
| 33 | XM_002278280.1            | <i>Vitis vinifera</i> seq 7                                       |
| 34 | XM_002278481.1            | <i>Vitis vinifera</i> seq 8                                       |
| 35 | XM_002278154.1            | <i>Vitis vinifera</i> seq 9                                       |
| 36 | XM_002278175.1            | <i>Vitis vinifera</i> seq 10                                      |
| 37 | XM_002278021.1            | <i>Vitis vinifera</i> seq 11                                      |
| 38 | XM_002273983.1            | <i>Vitis vinifera</i> seq 12                                      |
| 39 | XM_002274033.1            | <i>Vitis vinifera</i> seq 13                                      |
| 40 | XM_002277872.1            | <i>Vitis vinifera</i> seq 14                                      |
| 41 | XM_002277891.1            | <i>Vitis vinifera</i> seq 15                                      |
| 42 | XR_077883.1               | <i>Vitis vinifera</i> seq 16                                      |
| 43 | XM_002278258.1            | <i>Vitis vinifera</i> seq 17                                      |

|    |                |                                                            |
|----|----------------|------------------------------------------------------------|
| 44 | XR_077985.1    | <i>Vitis vinifera</i> seq 18                               |
| 45 | XM_002281332.1 | <i>Vitis vinifera</i> seq 19                               |
| 46 | FM178870.1     | <i>Vitis vinifera</i> ROMT1                                |
| 47 | XM_002281445.1 | <i>Vitis vinifera</i> OMT1                                 |
| 48 | EF535146.2     | <i>Vitis vinifera</i> OMT2                                 |
| 49 | XM_002517786.1 | <i>Rosa communis</i> O-methyltransferase1                  |
| 50 | XM_002517789.1 | <i>Ricinus communis</i> seq                                |
| 51 | XM_002517787.1 | <i>Ricinus communis</i> O-methyltransferase5               |
| 52 | XM_002338064.1 | <i>Populus trichocarpa</i> seq5                            |
| 53 | XM_002330641.1 | <i>Populus trichocarpa</i> flavonoid O-methyltransferase6  |
| 54 | XM_002335396.1 | <i>Populus trichocarpa</i> seq6                            |
| 55 | AJ698925.1     | <i>Populus deltoides</i> O-methyltransferase               |
| 56 | EF148749.1     | <i>Populus deltoides</i> seq1                              |
| 57 | XM_002332494.1 | <i>Populus trichocarpa</i> flavonoid O-methyltransferase9  |
| 58 | XM_002332497.1 | <i>Populus trichocarpa</i> seq1                            |
| 59 | XM_002334049.1 | <i>Populus trichocarpa</i> seq3                            |
| 60 | XM_002332498.1 | <i>Populus trichocarpa</i> seq2                            |
| 61 | XM_002327160.1 | <i>Populus trichocarpa</i> flavonoid O-methyltransferase5  |
| 62 | XM_002327161.1 | <i>Populus trichocarpa</i> seq4                            |
| 63 | XM_002334766.1 | <i>Populus trichocarpa</i> flavonoid O-methyltransferase11 |
| 64 | XM_002326000.1 | <i>Populus trichocarpa</i> flavonoid O-methyltransferase4  |
| 65 | XM_002517781.1 | <i>Ricinus communis</i> O-methyltransferase1               |
| 66 | XM_002538856.1 | <i>Ricinus communis</i> O-methyltransferase2               |
| 67 | XM_002525113.1 | <i>Ricinus communis</i> O-methyltransferase3               |
| 68 | XM_002525114.1 | <i>Ricinus communis</i> O- methyltransferase4              |
| 69 | HP001058.1     | <i>Arachis duranensis</i> seq                              |
| 70 | EU309727.1     | <i>Humulus lupulus</i> O -methyltransferase3               |
| 71 | AJ223151.1     | <i>Prunus amygdalus</i> O- methyltransferase               |
| 72 | U82011.1       | <i>Prunus armeniaca</i> O-methyltransferase                |
| 73 | AJ439744.1     | <i>Rosa hybrida</i> orcinol O-methyltransferase4           |
| 74 | AF502434.1     | <i>Rosa hybrida</i> orcinol O-methyltransferase2           |
| 75 | AJ439742.1     | <i>Rosa chinensis</i> orcinol O-methyltransferase2         |
| 76 | AJ439743.1     | <i>Rosa hybrida</i> orcinol O-methyltransferase3           |
| 77 | AF502433.1     | <i>Rosa hybrida</i> orcinol O-methyltransferase1           |
| 78 | AJ439741.1     | <i>Rosa chinensis</i> orcinol O-methyltransferase1         |
| 79 | AM182837.1     | <i>Rosa canina</i> orcinol O-methyltransferase             |
| 80 | AM182809.1     | <i>Rosa marretii</i> orcinol O-methyltransferase           |
| 81 | AM182769.1     | <i>Rosa banksiae</i> orcinol O-methyltransferase1          |
| 82 | AM182770.1     | <i>Rosa banksiae</i> orcinol O-methyltransferase2          |
| 83 | AM182810.1     | <i>Rosa marretii</i> orcinol O-methyltransferase1          |
| 84 | AM182848.1     | <i>Rosa marretii</i> orcinol O- methyltransferase2         |
| 85 | AM182806.1     | <i>Rosa hugonis</i> orcinol O-methyltransferase1           |
| 86 | AM182805.1     | <i>Rosa hugonis</i> orcinol O-methyltransferase2           |

|    |            |                                                     |
|----|------------|-----------------------------------------------------|
| 87 | AM182774.1 | <i>Rosa beggeriana</i> orcinol O-methyltransferase1 |
| 88 | AM182771.1 | <i>Rosa beggeriana</i> orcinol O-methyltransferase2 |
| 89 | AM182797.1 | <i>Rosa gigantea</i> orcinol O-methyltransferase1   |
| 90 | AM182795.1 | <i>Rosa gigantea</i> orcinol O-methyltransferase2   |
| 91 | AM182792.1 | <i>Rosa gallica</i> orcinol O-methyltransferase     |
| 92 | AJ786311.1 | <i>Rosa hybrida</i> orcinol O-methyltransferase5    |
| 93 | AM182786.1 | <i>Rosa chinensis</i> orcinol O-methyltransferase3  |
| 94 | AM182780.1 | <i>Rosa chinensis</i> orcinol O-methyltransferase4  |
| 95 | AM182787.1 | <i>Rosa chinensis</i> orcinol O-methyltransferase6  |
| 96 | AM182785.1 | <i>Rosa chinensis</i> orcinol O-methyltransferase5  |
