# Supplementary material for: Identification of white campion (Silene latifolia) guaiacol O-methyltransferase involved in the biosynthesis of veratrole, a key volatile for pollinator attraction
Source: PubMed Central journal article supplement (PMC3492160; doi:10.1186/1471-2229-12-158), 2012-08-31
Supplement: 1471-2229-12-158-S3.pdf [file 1471-2229-12-158-S3.pdf]

| <b>Site Models</b> | <b>tree <math>\ln L</math></b> | <b><math>\omega_0</math></b> | <b><math>\omega_1</math></b> | <b><math>2\delta</math></b> | <b><math>p</math> value</b> | <b>Significance<sup>1</sup></b> |
|--------------------|--------------------------------|------------------------------|------------------------------|-----------------------------|-----------------------------|---------------------------------|
| M0                 | -36389.00                      | 0.26987                      | -                            | -                           | -                           | -                               |
| M2 branch A        | -36384.09                      | 0.26815                      | 2.38762                      | 9.81881                     | 0.0017                      | **                              |
| M2 branch B        | -36384.67                      | 0.27258                      | 0.14358                      | 8.67                        | 0.0032                      | **                              |
| M2 branch C        | -36387.76                      | 0.26884                      | 1.18489                      | 2.49165                     | 0.114452                    | ns                              |

<sup>1</sup>ns, not significant ( $p \geq 0.05$ ); \*,  $p < 0.05$ ; \*\*,  $p < 0.01$ ; \*\*\*,  $p < 0.001$ ; \*\*\*\*,  $p < 0.0001$
