# Supplementary material for: Identification of white campion (Silene latifolia) guaiacol O-methyltransferase involved in the biosynthesis of veratrole, a key volatile for pollinator attraction
Source: PubMed Central journal article supplement (PMC3492160; doi:10.1186/1471-2229-12-158), 2012-08-31
Supplement: 1471-2229-12-158-S4.pdf [file 1471-2229-12-158-S4.pdf]

|                        | Primer Sequence 5'→3'           |
|------------------------|---------------------------------|
| Actin F                | ACC CAA ATC ATG TTC GAG ACA TTC |
| Actin R                | ATC ACC AGA ATC AAG CAC AAT ACC |
| EF1A F                 | CCA CAA CTC TAA CCC TAA TTT CCC |
| EF1A R                 | ATC ATA CTG ACG AGC ATC AAA CTG |
| CL285 F                | TTC ATT GCT TGC CAC TTC TG      |
| CL285 R                | CAA ATG CGA GCT GAA AAA CA      |
| qRT-GOMT F             | CCA TGA CCC TCC AAG ACC TA      |
| qRT-GOMT R             | ACC CAT AGC TCG GTT GAA CA      |
| Protein-SiGOMT/SdOMT-F | ATGGAAAACCCGAAAGAGCTACTAAACGC   |
| Protein-SiGOMT/SdOMT-R | TAAGCAACGCACTTCGATGACAGACC      |
